# Supplementary material for: Association between administration or recommendation of the human papillomavirus vaccine and primary care physicians’ knowledge about vaccination during proactive recommendation suspension: a nationwide cross-sectional study in Japan
Source: PubMed Central journal article supplement — BMJ Open. 2023 Nov 22;13(11):e074305. doi: 10.1136/bmjopen-2023-074305 (PMC10668282; doi:10.1136/bmjopen-2023-074305), 2023-11-22
Supplement: bmjopen-2023-074305supp001.pdf [file bmjopen-2023-074305supp001.pdf]

Supplementary Table 1-1 Factors associated with administration of HPV vaccine for routine vaccination

| Factors                                                                                             | PCPs who administer HPV vaccine, n=229 (23.3%)<br>n (%) | PCPs who do not administer HPV vaccine, n=752 (76.7%)<br>n (%) | Crude odds ratio (95% CI), n=981 | p-value | Adjusted odds ratio* (95% CI), n=977 | p-value |
|-----------------------------------------------------------------------------------------------------|---------------------------------------------------------|----------------------------------------------------------------|----------------------------------|---------|--------------------------------------|---------|
| High scores on vaccination quiz (4–6 points)                                                        | 172 (75.1)                                              | 339 (45.1)                                                     | 3.68 (2.64–5.12)                 | <0.001  | 2.28 (1.58–3.28)                     | <0.001  |
| Sex: male                                                                                           | 178 (77.7)                                              | 561 (74.6)                                                     | 1.19 (0.84–1.69)                 | 0.38    | 1.11 (0.75–1.65)                     | 0.6     |
| Postgraduate year (y)                                                                               |                                                         |                                                                |                                  |         |                                      |         |
| 3–5                                                                                                 | 14 (6.1)                                                | 78 (10.4)                                                      | Reference                        |         | Reference                            |         |
| 6–10                                                                                                | 28 (12.2)                                               | 150 (20.0)                                                     | 1.04 (0.52–2.09)                 | 0.91    | 0.48 (0.20–1.18)                     | 0.11    |
| 11–20                                                                                               | 95 (41.5)                                               | 263 (35.0)                                                     | 2.01 (1.09–3.72)                 | 0.026   | 0.83 (0.34–2.02)                     | 0.68    |
| 21–30                                                                                               | 51 (22.3)                                               | 142 (18.9)                                                     | 2.00 (1.04–3.84)                 | 0.037   | 0.91 (0.37–2.27)                     | 0.85    |
| 31–40                                                                                               | 34 (14.9)                                               | 100 (13.3)                                                     | 1.89 (0.95–3.77)                 | 0.069   | 0.80 (0.32–1.99)                     | 0.63    |
| ≥41                                                                                                 | 7 (3.1)                                                 | 19 (2.5)                                                       | 2.05 (0.73–5.79)                 | 0.17    | 0.79 (0.23–2.67)                     | 0.7     |
| Position of any specialist qualification                                                            | 201 (87.8)                                              | 643 (85.6)                                                     | 1.21 (0.77–1.88)                 | 0.41    | 1.04 (0.57–1.89)                     | 0.89    |
| Main practice category: primary care                                                                | 183 (79.9)                                              | 514 (68.4)                                                     | 1.84 (1.29–2.63)                 | 0.001   | 1.18 (0.74–1.88)                     | 0.5     |
| Practice setting                                                                                    |                                                         |                                                                |                                  |         |                                      |         |
| University hospital or general hospital                                                             | 28 (12.2)                                               | 253 (33.8)                                                     | Reference                        |         | Reference                            |         |
| Other hospital                                                                                      | 35 (15.3)                                               | 219 (29.2)                                                     | 1.44 (0.85–2.45)                 | 0.17    | 1.18 (0.68–2.06)                     | 0.55    |
| Clinic                                                                                              | 164 (71.6)                                              | 256 (34.2)                                                     | 5.79 (3.74–8.96)                 | <0.001  | 2.64 (1.60–4.36)                     | <0.001  |
| Others (i.e., University, research institution, government, and health organisation)                | 2 (0.87)                                                | 21 (2.8)                                                       | 0.86 (0.19–3.86)                 | 0.85    | 0.90 (0.22–3.73)                     | 0.88    |
| Providing daily paediatric medical service (≥ 10% of total patients)                                | 113 (49.3)                                              | 170 (22.6)                                                     | 3.33 (2.45–4.55)                 | <0.001  | 1.78 (1.24–2.55)                     | 0.002   |
| Mainly working in an urban area (≥ 50,000 people as an administrative unit of the local government) | 164 (71.6)                                              | 555 (74.0)                                                     | 0.89 (0.64–1.23)                 | 0.48    | 1.07 (0.73–1.55)                     | 0.74    |
| Experience as kindergarten or school physician                                                      | 165 (72.1)                                              | 309 (41.1)                                                     | 3.70 (2.68–5.11)                 | <0.001  | 2.12 (1.45–3.10)                     | <0.001  |
| Experience raising children                                                                         | 176 (76.9)                                              | 545 (72.5)                                                     | 1.26 (0.89–1.78)                 | 0.19    | 0.86 (0.56–1.32)                     | 0.48    |
| Information resource                                                                                |                                                         |                                                                |                                  |         |                                      |         |
| Government                                                                                          | 189 (82.5)                                              | 558 (74.2)                                                     | 1.64 (1.13–2.40)                 | 0.01    | 1.25 (0.82–1.90)                     | 0.29    |
| Academia                                                                                            | 226 (98.7)                                              | 687 (91.4)                                                     | 7.13 (2.22–22.90)                | 0.001   | 1.76 (0.55–5.64)                     | 0.34    |
| Commerce                                                                                            | 71 (31.0)                                               | 212 (28.2)                                                     | 1.14 (0.83–1.58)                 | 0.41    | 0.85 (0.58–1.23)                     | 0.38    |
| Social network service or mailing list by individuals or group of medical service providers         | 94 (41.1)                                               | 205 (27.3)                                                     | 1.86 (1.36–2.53)                 | <0.001  | 1.26 (0.88–1.80)                     | 0.21    |
| None                                                                                                | 0                                                       | 19 (2.5)                                                       | 0.08 (0.05–1.36)*                | 0.081   | 0.35 (0.02–8.24)                     | 0.52    |

\*Penalized maximum likelihood logistic regression. PCPs, primary care physicians; HPV, human papillomavirus; CI, confidence interval

Supplementary Table 1-2 Factors associated with administration of HPV vaccine for voluntary vaccination

| Factors                                                                                             | PCPs who administer HPV vaccine, n=175 (17.8%)<br>n (%) | PCPs who do not administer HPV vaccine, n=806 (82.2%)<br>n (%) | Crude odds ratio (95% CI), n=981 | p-value | Adjusted odds ratio* (95% CI), n=977 | p-value |
|-----------------------------------------------------------------------------------------------------|---------------------------------------------------------|----------------------------------------------------------------|----------------------------------|---------|--------------------------------------|---------|
| High scores on vaccination quiz (4–6 points)                                                        | 132 (75.4)                                              | 379 (47.0)                                                     | 3.46 (2.39–5.01)                 | <0.001  | 2.71 (1.81–4.04)                     | <0.001  |
| Sex: male                                                                                           | 131 (74.8)                                              | 608 (75.4)                                                     | 0.97 (0.66–1.41)                 | 0.87    | 0.89 (0.59–1.35)                     | 0.58    |
| Postgraduate year (y)                                                                               |                                                         |                                                                |                                  |         |                                      |         |
| 3–5                                                                                                 | 12 (6.9)                                                | 80 (9.9)                                                       | Reference                        |         | Reference                            |         |
| 6–10                                                                                                | 21 (12.0)                                               | 157 (19.5)                                                     | 0.89 (0.42–1.90)                 | 0.77    | 0.48 (0.19–1.23)                     | 0.13    |
| 11–20                                                                                               | 66 (37.7)                                               | 292 (36.2)                                                     | 1.51 (0.78–2.92)                 | 0.23    | 0.69 (0.27–1.75)                     | 0.43    |
| 21–30                                                                                               | 41 (23.4)                                               | 152 (18.9)                                                     | 1.80 (0.89–3.61)                 | 0.099   | 0.97 (0.38–2.50)                     | 0.96    |
| 31–40                                                                                               | 28 (16.0)                                               | 106 (13.2)                                                     | 1.76 (0.84–3.67)                 | 0.13    | 0.98 (0.38–2.53)                     | 0.97    |
| ≥41                                                                                                 | 7 (4.0)                                                 | 19 (2.4)                                                       | 2.46 (0.85–7.07)                 | 0.096   | 1.35 (0.40–4.57)                     | 0.63    |
| Position of any specialist qualification                                                            | 154 (88.0)                                              | 690 (85.7)                                                     | 1.22 (0.74–2.01)                 | 0.43    | 1.12 (0.59–2.12)                     | 0.73    |
| Main practice category: primary care                                                                | 141 (80.6)                                              | 556 (69.0)                                                     | 1.86 (1.25–2.79)                 | 0.002   | 1.52 (0.93–2.49)                     | 0.098   |
| Practice setting                                                                                    |                                                         |                                                                |                                  |         |                                      |         |
| University hospital or general hospital                                                             | 36 (20.6)                                               | 245 (30.5)                                                     | Reference                        |         | Reference                            |         |
| Other hospital                                                                                      | 29 (16.6)                                               | 225 (28.0)                                                     | 0.89 (0.52–1.48)                 | 0.62    | 0.68 (0.39–1.19)                     | 0.18    |
| Clinic                                                                                              | 109 (62.3)                                              | 311 (38.7)                                                     | 2.39 (1.58–3.60)                 | <0.001  | 1.27 (0.77–2.08)                     | 0.35    |
| Others (i.e., University, research institution, government, and health organisation)                | 1 (0.57)                                                | 22 (2.7)                                                       | 0.31 (0.04–2.37)                 | 0.26    | 0.37 (0.06–2.10)                     | 0.26    |
| Providing daily paediatric medical service (≥ 10% of total patients)                                | 66 (37.7)                                               | 217 (26.9)                                                     | 1.64 (1.17–2.32)                 | 0.005   | 1.04 (0.70–1.55)                     | 0.84    |
| Mainly working in an urban area (≥ 50,000 people as an administrative unit of the local government) | 135 (77.1)                                              | 584 (72.6)                                                     | 1.27 (0.86–1.87)                 | 0.22    | 1.26 (0.83–1.91)                     | 0.27    |
| Experience as kindergarten or school physician                                                      | 106 (60.6)                                              | 368 (45.7)                                                     | 1.83 (1.31–2.55)                 | <0.001  | 1.23 (0.82–1.84)                     | 0.31    |
| Experience raising children                                                                         | 129 (73.7)                                              | 592 (73.5)                                                     | 1.01 (0.70–1.47)                 | 0.07    | 0.70 (0.45–1.08)                     | 0.11    |
| Information resource                                                                                |                                                         |                                                                |                                  |         |                                      |         |
| Government                                                                                          | 152 (86.9)                                              | 595 (73.8)                                                     | 2.34 (1.47–3.73)                 | <0.001  | 1.90 (1.17–3.08)                     | 0.009   |
| Academia                                                                                            | 170 (97.1)                                              | 743 (92.2)                                                     | 2.88 (1.14–7.28)                 | 0.025   | 0.93 (0.35–2.43)                     | 0.88    |
| Commerce                                                                                            | 55 (31.4)                                               | 228 (28.3)                                                     | 1.16 (0.82–1.66)                 | 0.41    | 0.84 (0.57–1.25)                     | 0.39    |
| Social network service or mailing list by individuals or group of medical service providers         | 80 (45.7)                                               | 219 (27.2)                                                     | 2.26 (1.61–3.16)                 | <0.001  | 1.82 (1.25–2.64)                     | 0.002   |
| None                                                                                                | 0                                                       | 19 (2.4)                                                       | 0.12 (0.01–1.91)*                | 0.13    | 0.39 (0.02–8.00)                     | 0.54    |

\*Penalized maximum likelihood logistic regression. PCPs, primary care physicians; HPV, human papillomavirus; CI, confidence interval
