# Supplementary material for: Association between administration or recommendation of the human papillomavirus vaccine and primary care physicians’ knowledge about vaccination during proactive recommendation suspension: a nationwide cross-sectional study in Japan
Source: PubMed Central journal article supplement — BMJ Open. 2023 Nov 22;13(11):e074305. doi: 10.1136/bmjopen-2023-074305 (PMC10668282; doi:10.1136/bmjopen-2023-074305), 2023-11-22
Supplement: bmjopen-2023-074305supp002.pdf [file bmjopen-2023-074305supp002.pdf]

Supplementary Table 2-1 Factors associated with recommendation of HPV vaccine for routine vaccination

| Factors                                                                                            | PCPs who recommend HPV vaccine, n=408 (41.6%)<br>n (%) | PCPs who do not recommend HPV vaccine, n=573 (58.4%)<br>n (%) | Crude odds ratio (95% CI), n=981 | p-value | Adjusted odds ratio (95% CI), n=977 | p-value |
|----------------------------------------------------------------------------------------------------|--------------------------------------------------------|---------------------------------------------------------------|----------------------------------|---------|-------------------------------------|---------|
| High scores on vaccination quiz (4–6 points)                                                       | 248 (60.8)                                             | 263 (45.9)                                                    | 1.83 (1.41–2.36)                 | <0.001  | 2.17 (1.62–2.92)                    | <0.001  |
| Sex: male                                                                                          | 319 (78.2)                                             | 420 (73.3)                                                    | 1.31 (0.97–1.76)                 | 0.08    | 1.37 (0.99–1.90)                    | 0.056   |
| Postgraduate year (y)                                                                              |                                                        |                                                               |                                  |         |                                     |         |
| 3–5                                                                                                | 44 (10.8)                                              | 48 (8.4)                                                      | Reference                        |         | Reference                           |         |
| 6–10                                                                                               | 69 (16.9)                                              | 109 (19.0)                                                    | 0.69 (0.42–1.15)                 | 0.15    | 0.89 (0.47–1.68)                    | 0.72    |
| 11–20                                                                                              | 153 (37.5)                                             | 205 (35.8)                                                    | 0.81 (0.51–1.29)                 | 0.38    | 1.03 (0.53–1.99)                    | 0.94    |
| 21–30                                                                                              | 90 (22.1)                                              | 103 (18.0)                                                    | 0.95 (0.58–1.57)                 | 0.85    | 1.28 (0.64–2.53)                    | 0.48    |
| 31–40                                                                                              | 45 (11.0)                                              | 89 (15.5)                                                     | 0.55 (0.32–0.95)                 | 0.032   | 0.73 (0.36–1.48)                    | 0.38    |
| ≥41                                                                                                | 7 (1.7)                                                | 19 (3.3)                                                      | 0.40 (0.15–1.05)                 | 0.062   | 0.56 (0.19–1.62)                    | 0.28    |
| Position of any specialist qualification                                                           | 347 (85.1)                                             | 497 (86.9)                                                    | 0.86 (0.60–1.24)                 | 0.41    | 0.79 (0.49–1.29)                    | 0.35    |
| Main practice category: primary care                                                               | 281 (68.9)                                             | 416 (72.6)                                                    | 0.84 (0.63–1.10)                 | 0.21    | 0.79 (0.55–1.11)                    | 0.18    |
| Practice setting                                                                                   |                                                        |                                                               |                                  |         |                                     |         |
| University hospital or general hospital                                                            | 143 (33.8)                                             | 143 (25.1)                                                    | Reference                        |         | Reference                           |         |
| Other hospital                                                                                     | 101 (24.8)                                             | 219 (29.2)                                                    | 0.68 (0.49–0.96)                 | 0.03    | 0.69 (0.48–1.00)                    | 0.048   |
| Clinic                                                                                             | 161 (39.5)                                             | 259 (45.4)                                                    | 0.64 (0.47–0.87)                 | 0.005   | 0.67 (0.46–0.98)                    | 0.041   |
| Others (e.g., University, research institution, government, and health organisation)               | 8 (2.0)                                                | 15 (2.6)                                                      | 0.55 (0.23–1.34)                 | 0.19    | 0.51 (0.20–1.31)                    | 0.16    |
| Providing daily paediatric medical service (≥10% of total patients)                                | 95 (23.3)                                              | 188 (32.8)                                                    | 0.62 (0.47–0.83)                 | 0.001   | 0.50 (0.36–0.70)                    | <0.001  |
| Mainly working in an urban area (≥50,000 people as an administrative unit of the local government) | 305 (74.9)                                             | 414 (72.4)                                                    | 1.14 (0.85–1.52)                 | 0.37    | 1.08 (0.78–1.47)                    | 0.65    |
| Experience as kindergarten or school physician                                                     | 190 (46.6)                                             | 284 (49.6)                                                    | 0.89 (0.69–1.14)                 | 0.36    | 1.09 (0.80–1.49)                    | 0.57    |
| Experience raising children                                                                        | 296 (72.6)                                             | 425 (74.2)                                                    | 0.92 (0.69–1.23)                 | 0.57    | 0.79 (0.56–1.10)                    | 0.16    |
| Information resource                                                                               |                                                        |                                                               |                                  |         |                                     |         |
| Government                                                                                         | 294 (72.1)                                             | 453 (79.1)                                                    | 0.68 (0.51–0.92)                 | 0.011   | 0.69 (0.50–0.96)                    | 0.026   |
| Academia                                                                                           | 385 (94.4)                                             | 528 (92.2)                                                    | 1.43 (0.85–2.40)                 | 0.18    | 1.21 (0.63–2.35)                    | 0.56    |
| Commerce                                                                                           | 113 (27.7)                                             | 170 (29.7)                                                    | 0.91 (0.69–1.20)                 | 0.5     | 0.91 (0.67–1.25)                    | 0.56    |
| Social network service or mailing list by individuals or group of medical service providers        | 136 (33.3)                                             | 163 (28.5)                                                    | 1.26 (0.96–1.65)                 | 0.1     | 1.33 (0.98–1.82)                    | 0.071   |
| None                                                                                               | 7 (1.7)                                                | 12 (2.1)                                                      | 0.82 (0.32–2.09)                 | 0.67    | 0.82 (0.25–2.68)                    | 0.74    |

PCPs, primary care physicians; HPV, human papillomavirus; CI, confidence interval

Supplementary Table 2-2 Factors associated with recommendation of HPV vaccine for voluntary vaccination

| Factors                                                                                            | PCPs who recommend HPV vaccine, n=216 (22.0%)<br>n (%) | PCPs who do not recommend HPV vaccine, n=765 (78.0%)<br>n (%) | Crude odds ratio (95% CI), n=981 | p-value | Adjusted odds ratio (95% CI), n=977 | p-value |
|----------------------------------------------------------------------------------------------------|--------------------------------------------------------|---------------------------------------------------------------|----------------------------------|---------|-------------------------------------|---------|
| High scores on vaccination quiz (4–6 points)                                                       | 131 (60.6)                                             | 380 (49.7)                                                    | 1.56 (1.15–2.12)                 | 0.005   | 1.88 (1.32–2.67)                    | <0.001  |
| Sex: male                                                                                          | 174 (80.6)                                             | 565 (73.9)                                                    | 1.47 (1.01–2.13)                 | 0.045   | 1.67 (1.12–2.49)                    | 0.012   |
| Postgraduate year (y)                                                                              |                                                        |                                                               |                                  |         |                                     |         |
| 3–5                                                                                                | 24 (11.1)                                              | 68 (8.9)                                                      | Reference                        |         | Reference                           |         |
| 6–10                                                                                               | 30 (13.9)                                              | 148 (19.4)                                                    | 0.57 (0.31–1.06)                 | 0.074   | 0.81 (0.37–1.75)                    | 0.59    |
| 11–20                                                                                              | 87 (40.3)                                              | 271 (35.4)                                                    | 0.91 (0.54–1.54)                 | 0.72    | 1.40 (0.63–3.08)                    | 0.41    |
| 21–30                                                                                              | 52 (24.1)                                              | 141 (18.4)                                                    | 1.04 (0.59–1.84)                 | 0.88    | 1.73 (0.77–3.88)                    | 0.19    |
| 31–40                                                                                              | 21 (9.7)                                               | 113 (14.8)                                                    | 0.53 (0.27–1.02)                 | 0.056   | 0.84 (0.36–1.98)                    | 0.69    |
| ≥41                                                                                                | 2 (0.9)                                                | 24 (3.1)                                                      | 0.24 (0.05–1.02)                 | 0.062   | 0.38 (0.07–1.89)                    | 0.24    |
| Position of any specialist qualification                                                           | 184 (85.2)                                             | 660 (86.4)                                                    | 0.91 (0.59–1.39)                 | 0.65    | 0.74 (0.40–1.35)                    | 0.32    |
| Main practice category: primary care                                                               | 148 (68.5)                                             | 549 (71.7)                                                    | 0.86 (0.62–1.19)                 | 0.35    | 0.84 (0.55–1.27)                    | 0.4     |
| Practice setting                                                                                   |                                                        |                                                               |                                  |         |                                     |         |
| University hospital or general hospital                                                            | 81 (37.5)                                              | 200 (26.3)                                                    | Reference                        |         | Reference                           |         |
| Other hospital                                                                                     | 53 (24.5)                                              | 201 (26.4)                                                    | 0.65 (0.44–0.97)                 | 0.03    | 0.69 (0.45–1.06)                    | 0.091   |
| Clinic                                                                                             | 77 (35.7)                                              | 343 (45.0)                                                    | 0.55 (0.39–0.79)                 | 0.001   | 0.67 (0.43–1.04)                    | 0.075   |
| Others (e.g., University, research institution, government, and health organisation)               | 5 (2.3)                                                | 18 (2.4)                                                      | 0.69 (0.25–1.91)                 | 0.47    | 0.63 (0.21–1.84)                    | 0.4     |
| Providing daily paediatric medical service (≥10% of total patients)                                | 43 (19.9)                                              | 240 (31.4)                                                    | 0.54 (0.38–0.78)                 | 0.001   | 0.52 (0.34–0.78)                    | 0.002   |
| Mainly working in an urban area (≥50,000 people as an administrative unit of the local government) | 171 (80.0)                                             | 547 (71.6)                                                    | 1.59 (1.10–2.30)                 | 0.014   | 1.42 (0.95–2.11)                    | 0.084   |
| Experience as kindergarten or school physician                                                     | 87 (40.3)                                              | 387 (50.6)                                                    | 0.66 (0.48–0.90)                 | 0.008   | 0.79 (0.55–1.14)                    | 0.21    |
| Experience raising children                                                                        | 153 (70.8)                                             | 568 (74.3)                                                    | 0.84 (0.60–1.18)                 | 0.32    | 0.67 (0.45–1.00)                    | 0.049   |
| Information resource                                                                               |                                                        |                                                               |                                  |         |                                     |         |
| Government                                                                                         | 155 (71.8)                                             | 592 (77.4)                                                    | 0.74 (0.53–1.04)                 | 0.087   | 0.80 (0.55–1.16)                    | 0.24    |
| Academia                                                                                           | 202 (93.5)                                             | 711 (92.9)                                                    | 1.10 (0.60–2.01)                 | 0.77    | 0.94 (0.44–2.04)                    | 0.88    |
| Commerce                                                                                           | 60 (27.8)                                              | 223 (29.2)                                                    | 0.93 (0.67–1.31)                 | 0.69    | 0.91 (0.63–1.32)                    | 0.62    |
| Social network service or mailing list by individuals or group of medical service providers        | 79 (36.6)                                              | 220 (28.8)                                                    | 1.43 (1.04–1.96)                 | 0.028   | 1.56 (1.09–2.24)                    | 0.016   |
| None                                                                                               | 4 (1.9)                                                | 15 (2.0)                                                      | 0.94 (0.31–2.87)                 | 0.92    | 0.84 (0.21–3.40)                    | 0.81    |

PCPs, primary care physicians; HPV, human papillomavirus; CI, confidence interval
